# Supplementary figures and images for: Formation of typical disinfection by-products (DBPs) during chlorination and chloramination of polymyxin B sulfate
Source: Royal Society of Chemistry journal article supplement (doi:10.1039/d3ra01981k), 2023-01-01

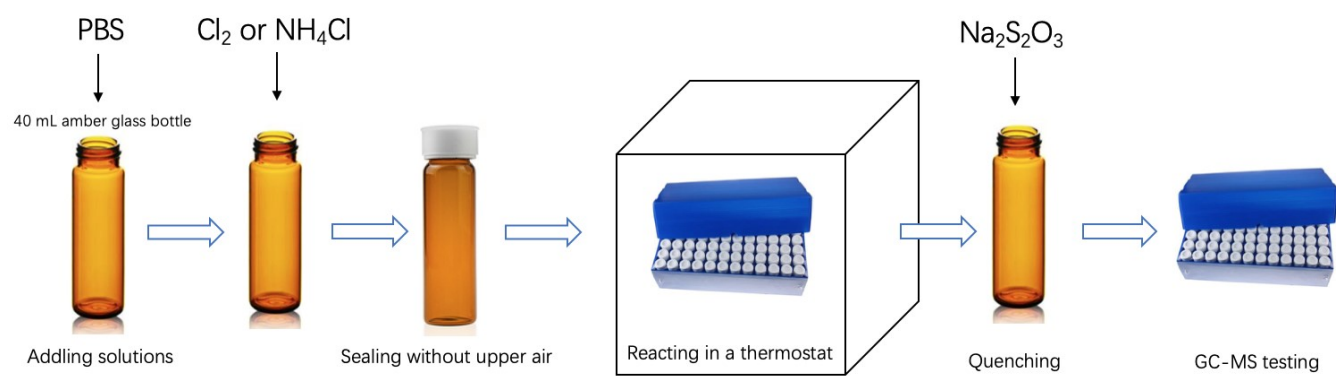

Fig. S1 Schematic of the experimental setup.

Supplement: d3ra01981k1.pdf [file d3ra01981k1.pdf]
